# Supplementary material for: MamO Is a Repurposed Serine Protease that Promotes Magnetite Biomineralization through Direct Transition Metal Binding in Magnetotactic Bacteria
Source: PLoS Biol. 2016 Mar 16;14(3):e1002402. doi: 10.1371/journal.pbio.1002402 (PMC4794232; doi:10.1371/journal.pbio.1002402)
Supplement: S1 Data — (XLSX) [file pbio.1002402.s001.xlsx]

## Sheet: Fig2A
Strain	Cmag	StDev
WT	2.31	0.14
ΔOΔR9	1	0
ΔOΔR9/Owt	2.18	0.12
ΔOΔR9/Oh116a	1.02	0
ΔOΔR9/Od149a	1.02	0
ΔOΔR9/Ot225a	2.11	0.06

## Sheet: Fig2D
Measured crystals sizes for mamO alleles by TEM
ΔmamO/Owt	ΔmamO/Oh116a	ΔmamO/Od149a	ΔmamO/Ot225a
3.82022	6	6.07955	8.80682
10.6667	6.96	6.36364	10.4545
10.7865	7.19101	7.5	10.6154
10.7865	7.36	8.30769	12.5714
11.573	7.76	8.75	12.72
11.9101	8.08	9.04	13.0337
13.4831	8.38095	9.2	13.04
14.2697	8.4	9.36	13.1818
14.382	8.4	9.65909	13.44
14.4762	8.56	9.71591	14
14.9231	8.64	9.77273	14.0952
16.4045	8.66667	9.82955	14.16
16.6292	8.72	9.92	14.2857
16.6292	9.2	10	14.6591
16.8539	9.36	10	14.7159
17.8095	9.44	10.2841	15.0769
17.8095	9.66292	10.3077	15.2
17.8652	9.68	10.3409	15.2273
18.1905	9.77528	10.4545	15.3333
18.5393	9.77528	10.4615	15.4286
19.5238	9.90476	10.56	15.5238
20.1905	10	10.5682	15.84
20.2857	10.16	10.6818	15.92
20.4494	10.24	10.7692	15.9659
20.6742	10.24	10.9659	16.0795
20.6742	10.3371	11.0227	16.1905
21.1236	10.4494	11.12	16.4615
21.3483	10.56	11.2308	16.48
21.3483	10.5618	11.28	16.8571
21.6923	10.5714	11.3068	17.0769
22.0225	10.64	11.52	17.12
22.0225	10.7619	11.6477	17.3846
22.4615	10.88	11.6923	17.6136
22.5843	10.9524	11.7045	17.8977
22.6966	11.04	11.7614	18.2857
23.0337	11.236	11.84	18.6667
23.1461	11.4286	11.8462	18.6932
23.2584	11.6	12.08	18.7692
23.5955	11.84	12.32	18.8571
23.9048	11.92	12.48	19.5506
24.0449	12.08	12.56	19.7159
24.1538	12.16	12.8	20
24.1573	12.24	13.12	20.08
24.1573	12.3596	13.2	20.2247
24.5714	12.3596	13.2955	20.2841
24.9524	12.4719	13.3846	20.4762
25.1685	12.56	13.4091	20.6667
25.1685	12.7619	13.5795	20.9524
25.2809	12.809	13.8068	20.96
25.2809	12.88	13.8636	21.0476
25.618	12.9213	13.92	21.2
25.7303	13.1461	13.92	22.1591
25.9551	13.2	13.9205	23.3333
25.9551	13.2381	14	23.4091
26.8539	13.3708	14	23.8462
26.8539	13.4831	14.24	24
27.0787	13.4831	14.375	24.4886
27.4157	13.5955	14.4	24.6667
28.3146	13.76	14.4318	24.7191
29.0476	13.8095	14.4615	24.88
29.5385	13.8202	14.48	25.0769
29.5506	13.9048	14.48	25.44
29.9048	13.92	14.4886	25.52
30.2247	13.9326	14.8295	26.0952
30.2247	14.0449	14.96	26.5714
31.4607	14.08	15.0769	26.6667
32.2472	14.1573	15.1136	26.6667
32.3596	14.4	15.2841	26.9318
32.6966	14.4762	15.44	27.2381
32.8571	14.4944	15.68	27.6923
33.0476	14.4944	15.68	28.0952
33.2381	14.56	15.7955	28.4762
33.4831	14.6067	15.8462	28.7692
33.5238	14.7191	15.92	29.7159
33.5955	14.7619	16	30
33.9326	14.88	16.08	30
33.9326	14.9438	16.3068	30.1124
34.382	14.9438	16.6154	30.5714
34.7191	15.04	16.9886	30.6667
34.7191	15.04	17.04	30.7955
35.0562	15.12	17.0769	31.0769
35.0562	15.12	17.2308	31.5341
35.2809	15.28	17.28	31.5909
35.3933	15.28	17.4432	31.6
35.8427	15.36	17.52	31.8462
36.2921	15.6	17.5385	31.92
36.7619	15.6	17.5385	33.0476
36.9663	15.68	17.6	33.3333
37.0787	15.8095	17.6136	33.5227
37.5238	15.92	17.68	33.8202
37.6404	16	17.8977	33.9048
37.6404	16.0674	18	33.9048
37.8652	16.16	18.1818	34.4762
38.6154	16.16	18.2386	34.56
38.764	16.1798	18.2955	34.6023
38.764	16.2857	18.3077	35.1705
39.3258	16.6292	18.4	35.4545
39.7753	16.6292	18.4091	35.8523
40.6742	16.72	18.4091	35.8523
40.6742	16.72	18.5227	35.9091
41.0112	16.8571	18.9205	36.0952
41.0769	16.88	19.3182	36.381
41.236	16.88	19.36	36.4205
41.573	16.88	19.3846	36.72
41.7143	16.96	19.52	37.5568
41.7978	17.04	19.5385	37.6705
41.8095	17.0787	19.5455	38
42.1348	17.191	19.6591	38.1538
42.1905	17.4157	19.68	38.3077
42.2857	17.44	19.76	38.5714
42.4719	17.619	19.84	38.6667
42.4762	17.6404	19.8864	38.8
42.5843	17.68	20	38.9231
42.809	17.76	20.1136	39.2045
42.9213	17.9775	20.1136	39.6591
43.3708	18	20.1538	39.8295
43.4831	18.08	20.1538	40.0568
43.5955	18.0899	20.24	40.6667
43.7079	18.0899	20.4	40.6818
44.0449	18.16	20.48	40.72
44.0449	18.16	20.625	40.8571
44.2697	18.2022	20.625	41.5341
44.4762	18.32	20.7692	41.6854
44.6067	18.48	20.8	41.9048
44.7619	18.48	20.9231	42.1905
44.8571	18.48	20.9231	42.5
44.9438	18.7619	20.96	42.6705
45.5056	18.764	21.12	42.7841
45.618	18.8	21.3846	43.1429
45.9048	18.8	21.4773	43.2955
46.0674	18.8571	21.68	43.5227
46.0674	18.9524	21.7045	43.7143
46.0674	18.96	21.8462	43.8202
46.1798	19.1011	21.8462	44.1905
46.2921	19.2	21.875	44.4318
46.5169	19.28	22.1538	44.4762
46.5169	19.28	22.2727	45
46.7416	19.3258	22.3077	45.1705
46.7416	19.3258	22.32	45.2381
47.5238	19.36	22.3295	45.2381
47.5281	19.4382	22.4615	45.5238
47.7528	19.9048	22.4615	45.8523
47.7528	20	22.9545	46.381
47.9048	20	22.96	46.4615
47.9775	20	22.96	46.8182
48	20.2247	23.12	46.96
48.1905	20.24	23.28	47.04
48.3077	20.2857	23.6	47.0455
48.3146	20.48	23.6932	47.191
48.4615	20.48	23.84	47.2381
48.5393	20.56	24.0341	47.3034
48.8764	20.64	24.4	47.619
49.2135	20.6667	24.4615	47.7841
49.3846	20.6742	24.6154	47.84
49.5506	20.72	24.6591	49.0476
49.5506	20.7619	24.72	49.3182
49.619	21.12	24.72	49.6
50	21.2	24.7692	49.6629
50.1124	21.236	24.7727	49.6923
50.3371	21.28	24.88	49.84
50.4615	21.3483	24.88	50.625
50.7865	21.4286	24.8864	50.9524
50.8989	21.44	25.0769	51.0227
50.8989	21.619	25.12	51.1932
50.8989	21.68	25.2	51.28
51.0112	21.84	25.5682	51.28
51.1236	21.9101	25.6923	51.3636
51.2381	22.08	25.6923	51.5238
51.4286	22.1348	25.9091	52.6154
52.1348	22.4	26	52.88
52.3596	22.88	26.32	53.0476
52.3596	22.88	26.4773	53.2955
53.3333	22.96	26.56	53.68
53.8202	23.2	26.9318	54.0952
53.8462	23.28	27.2308	54.96
54.0449	23.3333	27.44	55.0476
54.5714	23.6	27.52	55.4286
54.7191	23.7143	27.52	55.52
54.8571	23.9326	27.52	55.5238
54.9438	24	27.6	56.0227
55.9551	24.0449	27.68	56.3636
56.0952	24.381	27.76	57.2381
56.2857	24.7619	27.76	57.2727
56.2857	24.88	28.3077	57.3034
56.2921	24.9438	29.04	57.3333
57.0787	25.44	29.0769	57.36
57.0787	26	29.28	57.3864
57.6404	26.24	29.6	57.76
57.6404	26.2921	29.76	58.0952
57.9775	26.6667	30.24	58.64
57.9775	26.7416	30.24	58.64
58.427	26.7416	30.625	58.75
58.764	27.0787	31.68	59.04
59.1011	27.12	31.76	59.12
59.5506	27.1429	31.84	59.84
59.6629	27.2	32.9231	60
59.8876	27.619	34.1538	60.4
59.8876	28.4762	39.28	61.0112
60	28.48	46.9318	61.36
60.1124	28.8	48	62.2159
60.1124	29.0476	48.16	63.0476
61.1429	31.44	51.4205	67.0476
61.2308	32.0952	70.0568
61.236	33.4286
61.3333	36.9663
62.3077
63.5955
64.2697
64.8571
65.0769
69.2381
70.1124

## Sheet: Fig6E
Strain	Cmag	StDev
WT	1.97	0.01
ΔOΔR9	1	0
ΔOΔR9/Owt	2.01	0.07
ΔOΔR9/Oh148a	1	0
ΔOΔR9/Oh263a	1	0

## Sheet: FigS1
Strain	Cmag (30deg)	StDev (30deg)	Cmag (RT)	StDev (RT)
WT	1.9	0.02	1.72	0.02
ΔOΔR9	1	0	1	0
ΔOΔR9/Owt	1.82	0.03	1.75	0.1
ΔOΔR9/Oh116a	1.01	0.01	1.13	0.01
ΔOΔR9/Od149a	1.03	0	1.62	0.03
ΔOΔR9/Ot225a	1.7	0.05	1.77	0.01
ΔOΔR9/Oh148a	1	0	1	0
ΔOΔR9/Oh263a	1	0	1	0

## Sheet: FigS2
Strain	Cmag	StDev
WT	1.71	0.04
ΔOΔR9	1	0
ΔOΔR9/Owt*	1.51	0.01
ΔOΔR9/Oh116a*	1	0
ΔOΔR9/Od149a*	1.01	0
ΔOΔR9/Ot225a*	1.49	0.01
ΔOΔR9/Oh148a*	1	0
ΔOΔR9/Oh263a*	1	0
Strain	Cmag	StDev
WT	2.08	0.1
ΔOΔEΔR9	1	0
ΔOΔEΔR9/Owt*	1	0
ΔOΔEΔR9/Oh116a*	1	0
ΔOΔEΔR9/Ewt	1	0
ΔOΔEΔR9/Ewt/Owt*	1.82	0.05
ΔOΔEΔR9/Ewt/Oh116a*	1.01	0
ΔOΔEΔR9/Es297a	1	0
ΔOΔEΔR9/Es297a/Owt*	1.01	0
ΔOΔEΔR9/Es297a/Oh116a*	1	0
stars indicate N-terminally FLAG-tagged alleles

## Sheet: FigS3
Strain	Cmag	StDev
WT	1.76	0.03
ΔmamO	1	0
ΔmamO/Owt	1.74	0.03
ΔmamO/Oh116a	1.77	0.02
ΔmamO/Od149a	1.66	0.03
ΔmamO/Ot225a	1.74	0.04
ΔmamO/Oh148a	1.73	0.04
ΔmamO/Oh263a	1.71	0.06
